# Supplementary material for: Senecavirus A Enhances Its Adaptive Evolution via Synonymous Codon Bias Evolution
Source: MDPI journal article supplement (doi:10.3390/v14051055), 2022-05-16
Supplement: s1 [file s1]

**Supplementary Table S3. Information on recombination events of the SVA tested in the study**

| Event number | Abbreviate virus strain | Major parent | Minor parent | Breakpoints<br>(In alignment) |        | Average p-value of the detection methods |                        |                        |                        |                        |                         |                         |
|--------------|-------------------------|--------------|--------------|-------------------------------|--------|------------------------------------------|------------------------|------------------------|------------------------|------------------------|-------------------------|-------------------------|
|              |                         |              |              | Beginning                     | Ending | RDP                                      | Bootscan               | Maxchi                 | GeneConv               | Chimera                | Siscan                  | 3Seq                    |
| 1            | USA-09                  | USA-24       | USA-78       | 6987                          | 2770   | ND                                       | ND                     | $2.659 \times 10^{-5}$ | ND                     | $4.233 \times 10^{-4}$ | $8.763 \times 10^{-3}$  | $4.224 \times 10^{-2}$  |
| 2            | USA-22                  | USA-24       | Unknown      | 1590                          | 3434   | $4.555 \times 10^{-6}$                   | $6.578 \times 10^{-3}$ | $1.491 \times 10^{-7}$ | ND                     | $7.470 \times 10^{-8}$ | $7.262 \times 10^{-6}$  | $1.299 \times 10^{-9}$  |
| 3            | CAN-02                  | CAN-05       | Unknown      | 3060                          | 7114   | ND                                       | ND                     | $2.708 \times 10^{-5}$ | ND                     | $1.437 \times 10^{-3}$ | $1.425 \times 10^{-6}$  | $3.248 \times 10^{-10}$ |
| 4            | USA-24                  | USA-51       | CAN-04       | 2110                          | 3580   | NS                                       | ND                     | $2.027 \times 10^{-3}$ | ND                     | $1.342 \times 10^{-3}$ | $1.956 \times 10^{-2}$  | $1.686 \times 10^{-3}$  |
| 5            | CHN-01                  | CHN-13       | CHN-04       | 17                            | 1440   | $5.295 \times 10^{-11}$                  | $1.748 \times 10^{-7}$ | $2.160 \times 10^{-3}$ | $1.380 \times 10^{-6}$ | $5.131 \times 10^{-3}$ | $1.162 \times 10^{-4}$  | $5.251 \times 10^{-9}$  |
| 6            | CHN-05                  | CHN-09       | Unknown      | 17                            | 1687   | $1.097 \times 10^{-10}$                  | $1.487 \times 10^{-6}$ | $3.743 \times 10^{-4}$ | $3.741 \times 10^{-7}$ | $2.374 \times 10^{-3}$ | $1.027 \times 10^{-2}$  | $4.907 \times 10^{-8}$  |
| 7            | USA-35                  | USA-42       | CHN-16       | 892                           | 1808   | $6.807 \times 10^{-2}$                   | ND                     | $2.906 \times 10^{-3}$ | ND                     | $1.105 \times 10^{-2}$ | ND                      | $1.926 \times 10^{-3}$  |
| 8            | USA-55                  | USA-58       | CHN-56       | 1292                          | 1828   | $9.707 \times 10^{-5}$                   | $1.194 \times 10^{-3}$ | ND                     | $5.533 \times 10^{-4}$ | ND                     | ND                      | $1.896 \times 10^{-2}$  |
| 9            | USA-56                  | USA-70       | Unknown      | 1101                          | 3048   | $4.753 \times 10^{-2}$                   | ND                     | $9.922 \times 10^{-4}$ | $1.268 \times 10^{-3}$ | ND                     | $3.958 \times 10^{-15}$ | $1.216 \times 10^{-3}$  |
| 10           | USA-57                  | USA-70       | Unknown      | 866                           | 3076   | $1.863 \times 10^{-2}$                   | ND                     | $1.539 \times 10^{-4}$ | ND                     | $1.450 \times 10^{-5}$ | ND                      | $1.502 \times 10^{-5}$  |
| 11           | USA-59                  | USA-87       | Unknown      | 1239                          | 3048   | $2.593 \times 10^{-2}$                   | ND                     | $6.005 \times 10^{-8}$ | $1.096 \times 10^{-3}$ | $7.135 \times 10^{-6}$ | $1.984 \times 10^{-12}$ | $1.406 \times 10^{-5}$  |
| 12           | USA-60                  | USA-58       | CHN-56       | 1238                          | 1968   | $7.264 \times 10^{-5}$                   | $8.176 \times 10^{-5}$ | ND                     | $4.141 \times 10^{-4}$ | ND                     | ND                      | $2.406 \times 10^{-2}$  |
| 13           | USA-61                  | CHN-68       | Unknown      | 2312                          | 5118   | ND                                       | ND                     | $9.925 \times 10^{-6}$ | ND                     | $6.455 \times 10^{-3}$ | $7.672 \times 10^{-3}$  | $1.841 \times 10^{-5}$  |
| 14           | CHN-06                  | CHN-19       | CHN-56       | 7012                          | 3570   | $2.513 \times 10^{-3}$                   | ND                     | $4.564 \times 10^{-6}$ | ND                     | $1.098 \times 10^{-4}$ | $1.468 \times 10^{-9}$  | $6.077 \times 10^{-10}$ |
| 15           | CHN-09                  | CHN-13       | CHN-04       | 7070                          | 1440   | $6.016 \times 10^{-11}$                  | $1.986 \times 10^{-7}$ | $1.452 \times 10^{-3}$ | $1.569 \times 10^{-6}$ | $5.830 \times 10^{-3}$ | $1.320 \times 10^{-4}$  | $5.966 \times 10^{-9}$  |
| 16           | CHN-13                  | CHN-09       | Unknown      | 7070                          | 1440   | $1.097 \times 10^{-10}$                  | $1.487 \times 10^{-6}$ | $3.743 \times 10^{-4}$ | $3.741 \times 10^{-7}$ | $2.374 \times 10^{-3}$ | $1.027 \times 10^{-2}$  | $4.907 \times 10^{-8}$  |
| 17           | CHN-27                  | CHN-28       | CHN-19       | 4021                          | 5992   | $1.285 \times 10^{-8}$                   | $6.676 \times 10^{-5}$ | $1.344 \times 10^{-7}$ | $1.125 \times 10^{-6}$ | $2.821 \times 10^{-7}$ | $8.745 \times 10^{-6}$  | $9.446 \times 10^{-12}$ |
| 18           | CHN-35                  | USA-41       | CHN-25       | 1250                          | 2048   | $5.700 \times 10^{-3}$                   | $9.985 \times 10^{-3}$ | $1.855 \times 10^{-2}$ | ND                     | $1.109 \times 10^{-2}$ | ND                      | $1.666 \times 10^{-3}$  |
| 19           | CHN-39                  | CHN-38       | CHN-35       | 3319                          | 4512   | ND                                       | ND                     | $2.107 \times 10^{-6}$ | $2.558 \times 10^{-6}$ | $2.064 \times 10^{-6}$ | $1.818 \times 10^{-7}$  | $1.945 \times 10^{-16}$ |
| 11           |                         |              |              |                               |        |                                          |                        |                        |                        |                        |                         |                         |
| 20           | CHN-48                  | USA-85       | CHN-09       | 7070                          | 816    | $8.887 \times 10^{-6}$                   | ND                     | ND                     | $3.397 \times 10^{-4}$ | ND                     | $1.498 \times 10^{-2}$  | $1.609 \times 10^{-2}$  |
| 21           | CHN-52                  | USA-41       | CHN-25       | 1250                          | 2048   | $2.577 \times 10^{-3}$                   | $4.641 \times 10^{-3}$ | $2.744 \times 10^{-2}$ | ND                     | $1.072 \times 10^{-2}$ | $4.475 \times 10^{-2}$  | $1.400 \times 10^{-3}$  |
| 22           | CHN-54                  | USA-41       | CHN-25       | 1250                          | 2070   | $2.313 \times 10^{-3}$                   | $7.009 \times 10^{-3}$ | $2.333 \times 10^{-2}$ | ND                     | $9.120 \times 10^{-3}$ | ND                      | $1.190 \times 10^{-3}$  |
| 23           | USA-96                  | USA-41       | USA-60       | 842                           | 2656   | $5.483 \times 10^{-3}$                   | ND                     | $3.280 \times 10^{-3}$ | ND                     | $8.674 \times 10^{-4}$ | $1.717 \times 10^{-2}$  | $3.686 \times 10^{-6}$  |
| 24           | USA-105                 | USA-41       | CHN-16       | 855                           | 2467   | $1.103 \times 10^{-3}$                   | $8.139 \times 10^{-3}$ | $1.874 \times 10^{-3}$ | ND                     | $2.612 \times 10^{-4}$ | ND                      | $6.489 \times 10^{-5}$  |

|    |        |        |         |      |      |                         |                        |                        |                         |                        |                         |                        |
|----|--------|--------|---------|------|------|-------------------------|------------------------|------------------------|-------------------------|------------------------|-------------------------|------------------------|
| 25 | CHN-57 | CHN-40 | Unknown | 2132 | 3482 | $1.785 \times 10^{-4}$  | ND                     | $2.200 \times 10^{-6}$ | ND                      | $5.430 \times 10^{-7}$ | $3.771 \times 10^{-8}$  | $2.079 \times 10^{-9}$ |
| 26 | CHN-60 | CHN-24 | CHN-19  | 4245 | 5844 | $7.241 \times 10^{-8}$  | ND                     | $1.959 \times 10^{-3}$ | $3.373 \times 10^{-2}$  | $3.673 \times 10^{-4}$ | $7.738 \times 10^{-5}$  | $1.247 \times 10^{-8}$ |
| 27 | CHN-61 | USA-41 | CHN-56  | 852  | 2041 | $5.148 \times 10^{-4}$  | $1.165 \times 10^{-2}$ | $1.416 \times 10^{-2}$ | ND                      | $4.762 \times 10^{-3}$ | ND                      | $8.711 \times 10^{-3}$ |
| 28 | CHN-68 | USA-41 | CHN-25  | 1250 | 2048 | $2.855 \times 10^{-2}$  | ND                     | $2.076 \times 10^{-2}$ | ND                      | $1.085 \times 10^{-2}$ | ND                      | $1.999 \times 10^{-3}$ |
| 29 | CHN-69 | USA-41 | CHN-25  | 1250 | 2069 | $2.855 \times 10^{-2}$  | ND                     | $2.076 \times 10^{-2}$ | ND                      | $1.805 \times 10^{-2}$ | ND                      | $1.999 \times 10^{-3}$ |
| 30 | CHN-72 | CHN-58 | CHN-74  | 4086 | 5702 | $1.676 \times 10^{-11}$ | $2.146 \times 10^{-2}$ | $2.447 \times 10^{-7}$ | $8.545 \times 10^{-9}$  | $6.475 \times 10^{-6}$ | $3.728 \times 10^{-10}$ | $3.251 \times 10^{-5}$ |
| 31 | CHN-73 | CHN-58 | CHN-74  | 4077 | 5702 | $1.421 \times 10^{-12}$ | $4.470 \times 10^{-7}$ | $3.761 \times 10^{-7}$ | $3.988 \times 10^{-10}$ | $3.888 \times 10^{-6}$ | $4.384 \times 10^{-10}$ | $4.985 \times 10^{-8}$ |
| 32 | CHN-75 | USA-41 | CHN-25  | 1250 | 1974 | $2.855 \times 10^{-2}$  | ND                     | $2.076 \times 10^{-2}$ | ND                      | $1.805 \times 10^{-2}$ | ND                      | $1.999 \times 10^{-3}$ |
| 33 | CHN-77 | USA-41 | CHN-25  | 1250 | 2048 | $2.855 \times 10^{-2}$  | ND                     | $2.076 \times 10^{-2}$ | ND                      | $1.805 \times 10^{-2}$ | ND                      | $1.999 \times 10^{-3}$ |

ND: Recombination not detected with this algorithm.

In alignment: The genome sequence has been aligned by the alignment correction module of the Mega-X software.

Abbreviate: The full name of each virus strain has been abbreviated in this study. The exact full name is shown in Supplementary Table 1.
