# Supplementary material for: Senecavirus A Enhances Its Adaptive Evolution via Synonymous Codon Bias Evolution
Source: MDPI journal article supplement (doi:10.3390/v14051055), 2022-05-16
Supplement: s1 [file s1]

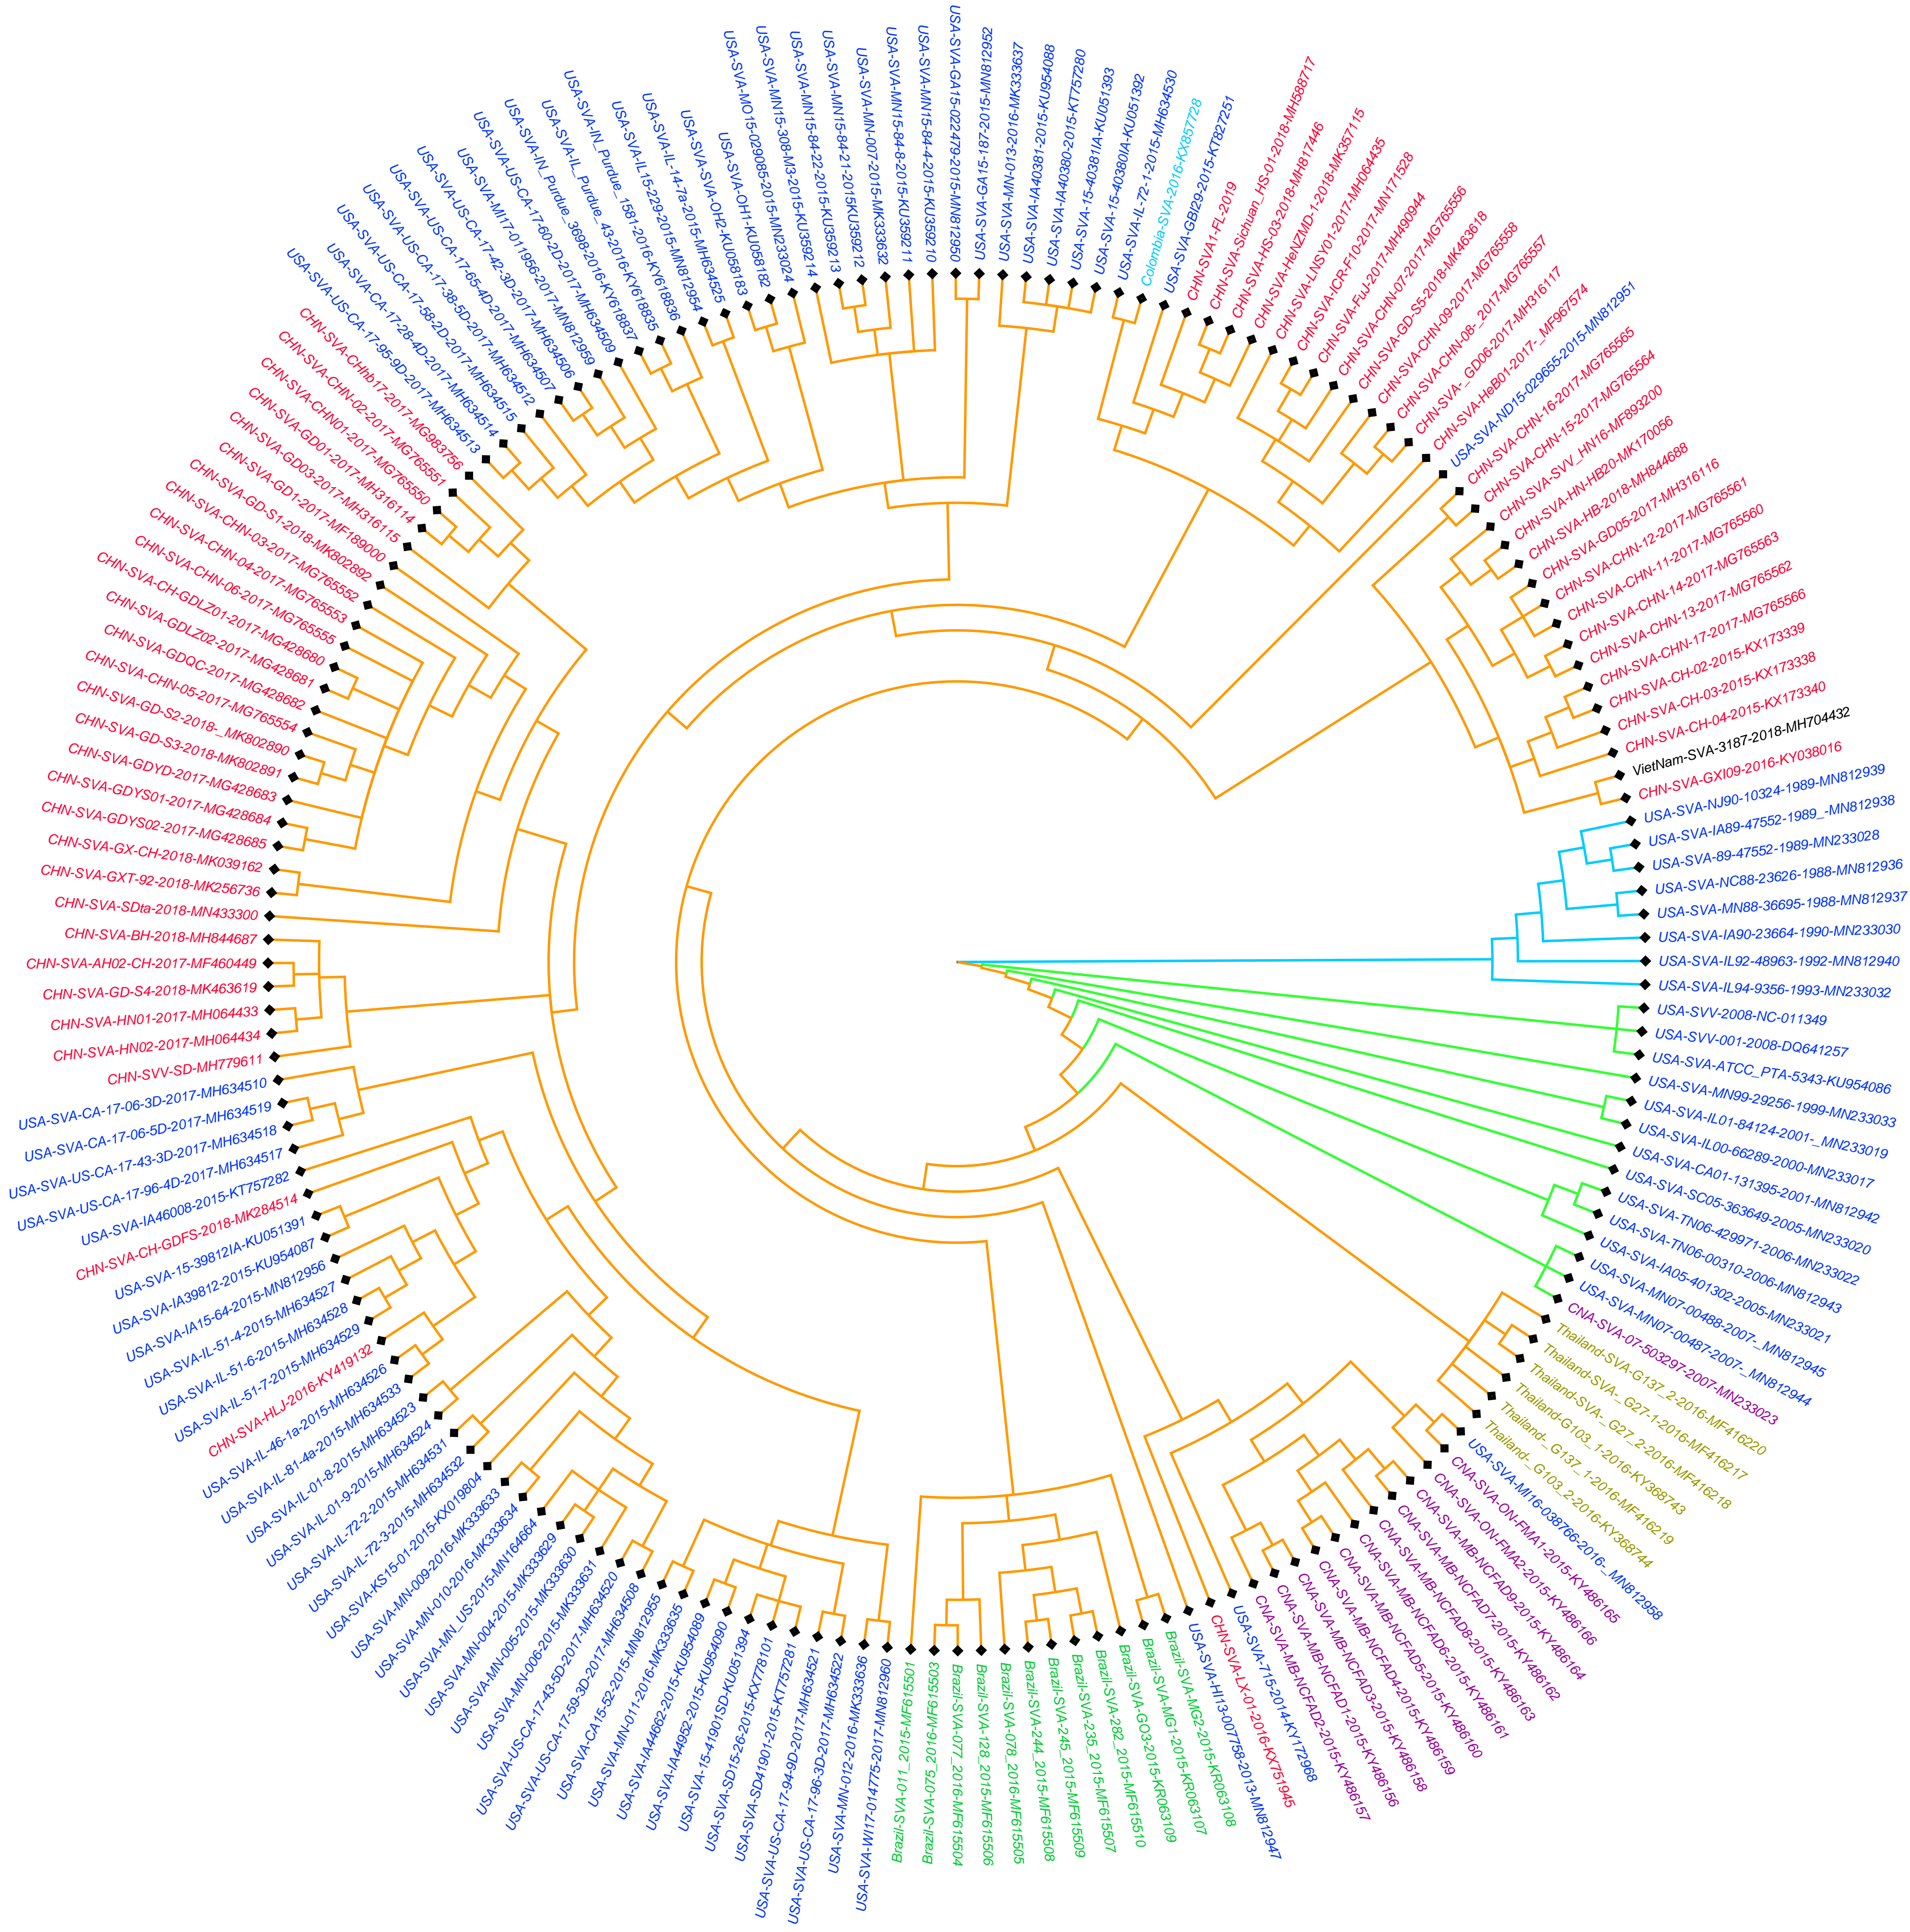

## Supplementary Figure Legends

### **Figure S1. The phylogenetic tree of SVA is constructed by a Bayesian algorithm**

The phylogenetic tree of SVA was constructed by the Bayesian calculation method. The color of the branching lines in the inner circle represents the phylogenetic clusters of the SVA, and here we use Group I, Group II, and Group III in blue, green, and saffron yellow. The color of the name of the round outer strain indicates the country from which it was isolated. Here, we use dark blue for the United States, red for China, purple for Canada, yellow for Thailand, green for Brazil, light blue for Colombia, and black for Vietnam.
